# Supplementary material for: Phosphorylation-dependent Regnase-1 release from endoplasmic reticulum is critical in IL-17 response
Source: PubMed Central journal article supplement — J Exp Med. 2019 May 9;216(6):1431–49. doi: 10.1084/jem.20181078 (PMC6547859; doi:10.1084/jem.20181078), 2019-05-09
Supplement: JEM_20181078_sm.pdf [file JEM_20181078_sm.pdf]

## Supplemental material

Tanaka et al., <https://doi.org/10.1084/jem.20181078>

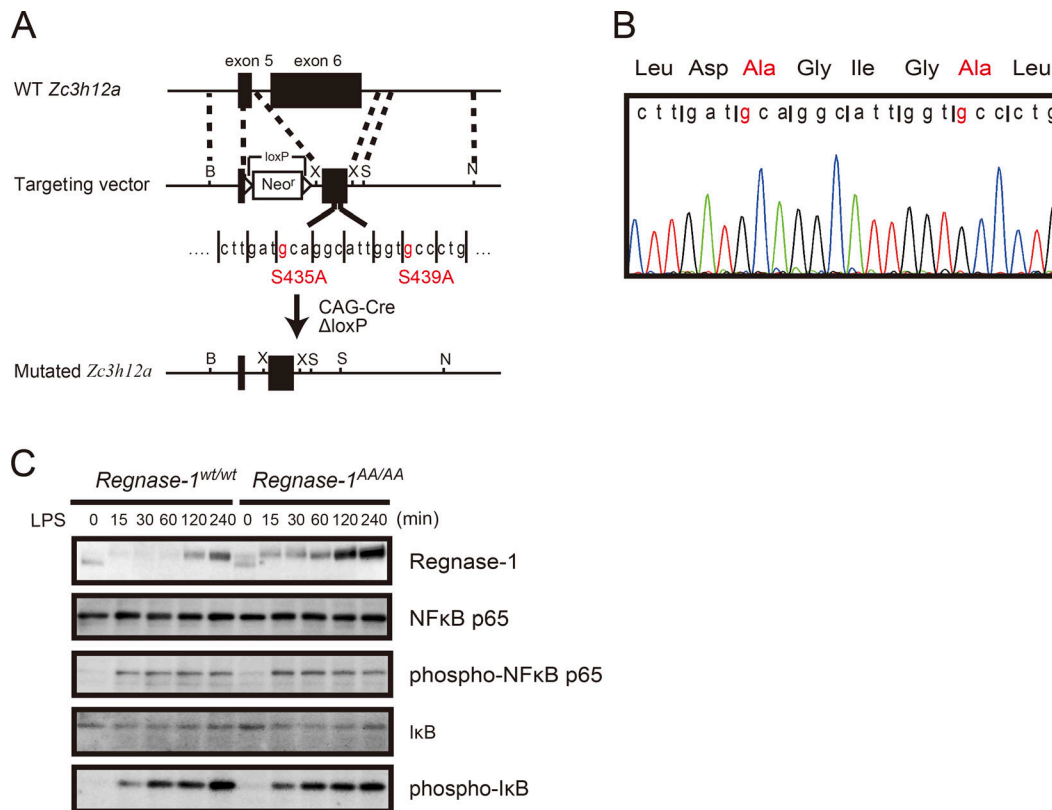

Figure S1. **Regnase-1 S435A/S439A (AA) knock-in mutation exerts resistance to IKK-mediated degradation. (A and B)** Generation of Regnase-1 S435A/S439A double knock-in (*Regnase-1<sup>AA/AA</sup>*) mice. **(A)** Schematic view of WT *Regnase-1* gene (top), targeting vector (middle), and predicted mutated allele (bottom). Targeting vector contains S435A and S439A mutations in exon 6. NEO<sup>r</sup>, neomycin resistance gene cassette. **(B)** Sequencing of *Regnase-1* exon 6 in the *Regnase-1<sup>AA/AA</sup>* mouse genome. Sequence chromatogram indicates replacement of TCA and TCC of Ser435 and Ser439 by GCA and GCC, respectively. **(C)** Immunoblotting analysis of Regnase-1, NF-κB, phospho-NF-κB, IκB, and phospho-IκB in WT and *Regnase-1<sup>AA/AA</sup>* macrophages stimulated with LPS (100 ng/ml) for 0–240 min.

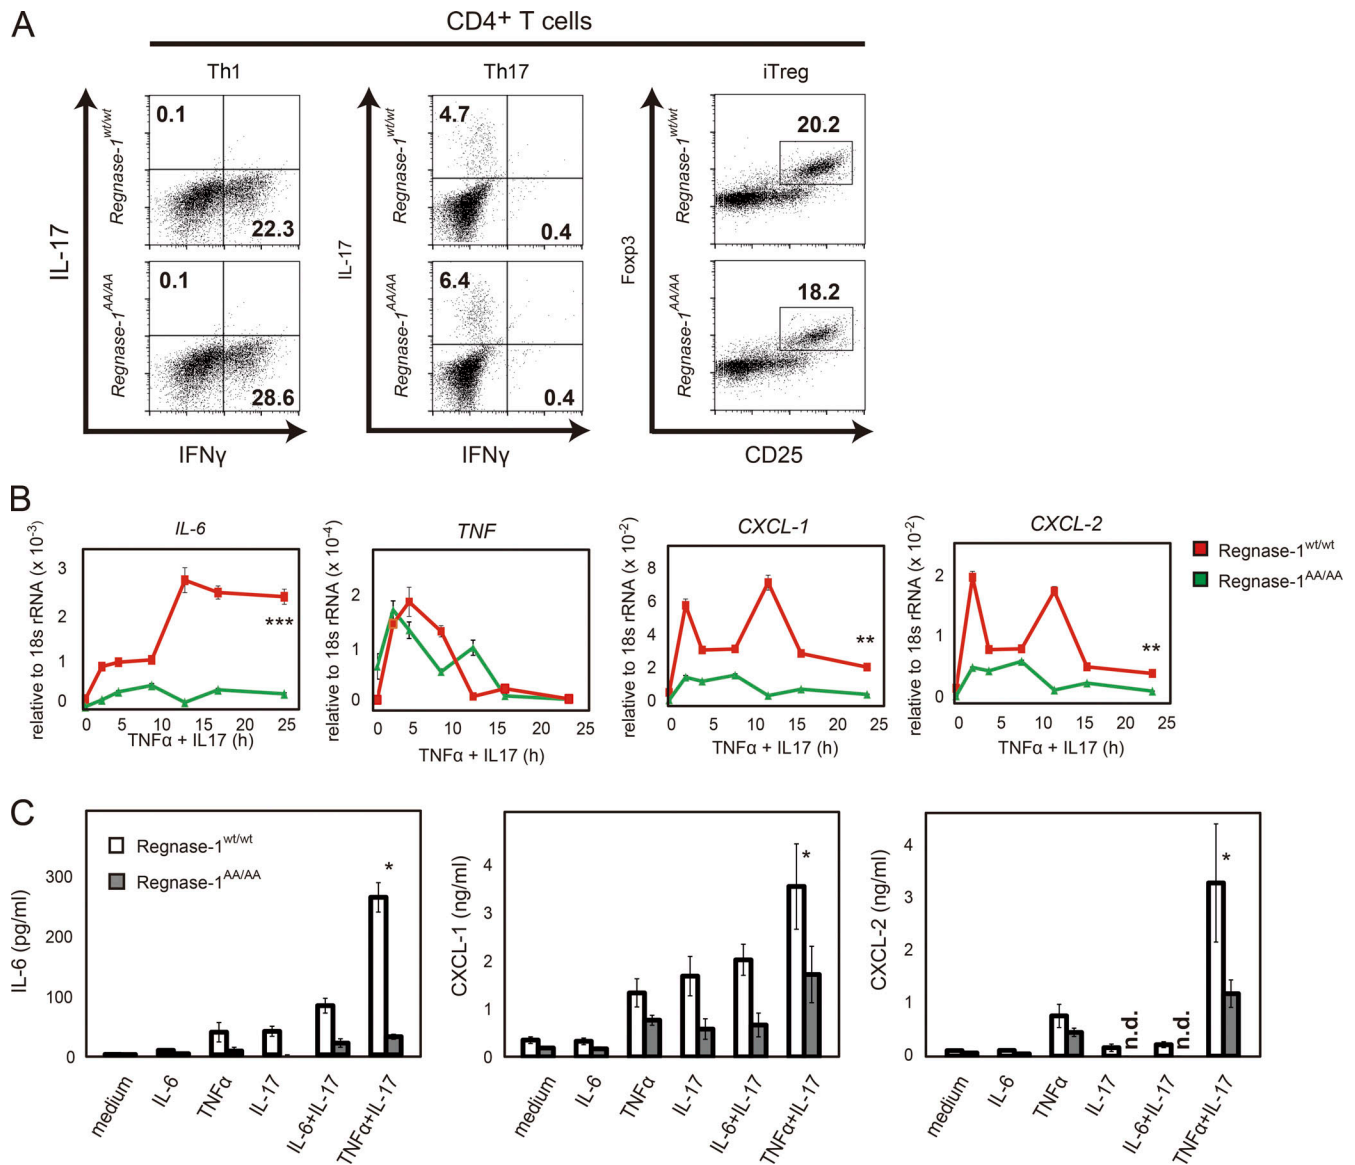

Figure S2. **Regnase-1<sup>AA/AA</sup> mutation attenuates EAE disease severity through suppression of inflammatory response in nonhematopoietic cells.** **(A)** Flow cytometry analysis of CD4<sup>+</sup> T cell subsets (Th1, Th17, and iTreg) differentiated from naive CD4<sup>+</sup> T cells in vitro. **(B)** Quantitative PCR analysis of *IL-6*, *TNF-α*, *CXCL-1*, and *CXCL-2* mRNA in WT and *Regnase-1<sup>AA/AA</sup>* LSECs. Cells were stimulated with TNF-α (20 ng/ml) and IL-17A (50 ng/ml) for 0–24 h. Data were collected from four independent experiments. \*\*, *P* < 0.01; \*\*\*, *P* < 0.005. **(C)** Production of IL-6, CXCL-1, and CXCL-2 by mouse LSECs in response to exposure to IL-6 (20 ng/ml), TNF-α (20 ng/ml), IL-17A (50 ng/ml), IL-6+IL-17A, or TNF-α+IL-17A for 24 h. Protein levels in cell supernatants were assessed by ELISA. Data were collected from three independent experiments. \*, *P* < 0.05. rRNA, ribosomal RNA; iTreg, induced regulatory T; n.d., no difference.

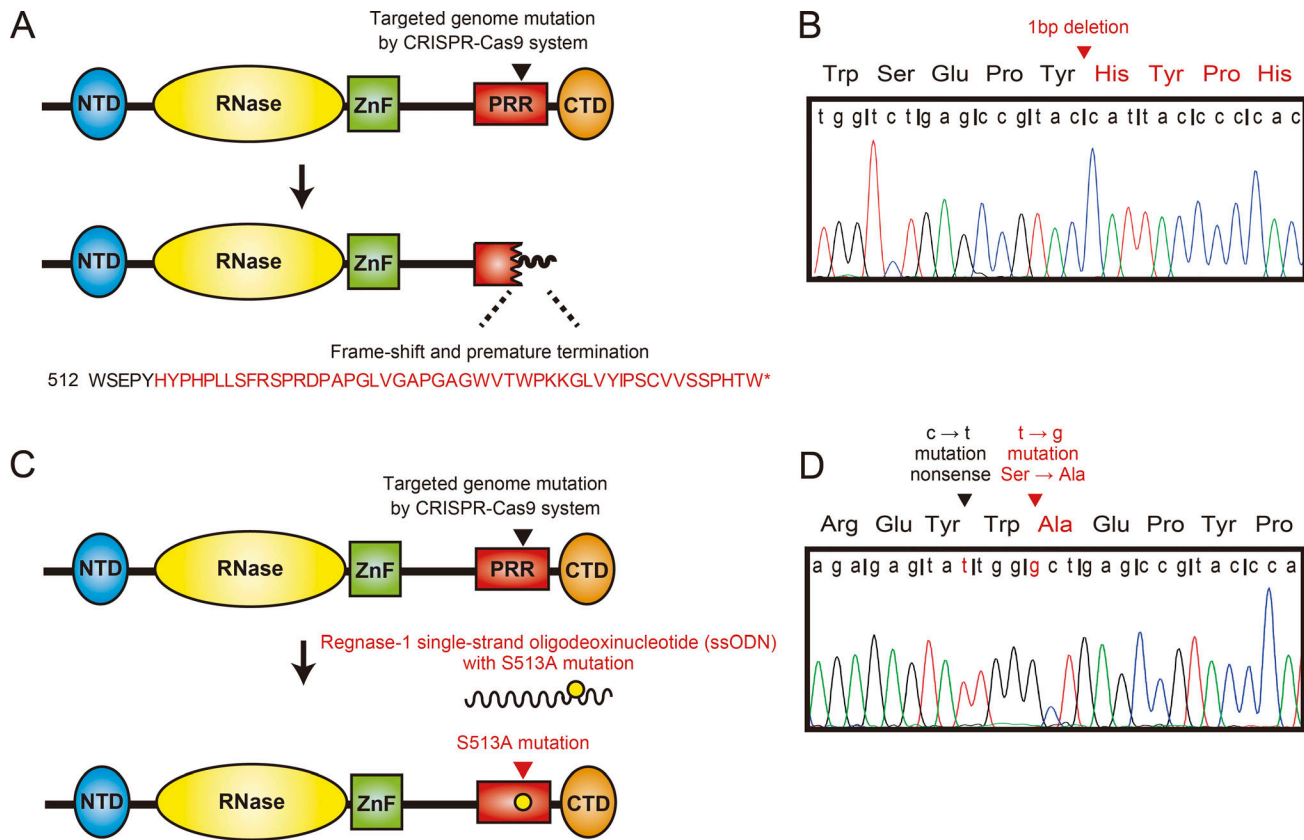

Figure S3. **Construction of Regnase-1 C-terminally truncated mutant mice (*Regnase-1*  $\Delta$ CTD mutant) with a 1-bp deletion that causes frameshift and the C-terminal truncation.** (A) Schematic view of WT Regnase-1 (top) and 1-bp truncated Regnase-1 (bottom). CRISPR/Cas9 targeting sites are located at the proline-rich region of Regnase-1. Amino acid sequences introduced by a frameshift mutation and a premature termination codon 146 bases downstream of the mutation are indicated in red. (B) Sequencing of *Regnase-1* exon 6 in the mouse genome mutated by CRISPR/Cas9. Sequence chromatogram indicates deletion of the cytosine base at Pro517 to initiate the frameshift mutation. (C) Schematic view of WT Regnase-1 (top) and S513A mutant of Regnase-1 (bottom). CRISPR/Cas9 targeting sites are located at Ser513 of Regnase-1. S513A mutation is introduced by coinjection of CRISPR/Cas9 targeting vector and single-strand oligodeoxynucleotide (ssODN) containing Regnase-1 exon sequence with S513A mutation. (D) Sequencing of *Regnase-1* exon 6 in the mouse genome mutated by CRISPR/Cas9. Sequence chromatogram indicates replacement of TAC and TAT of Tyr511 and TCT and GCT of Ser513, respectively.

(1) Lymph Node cells

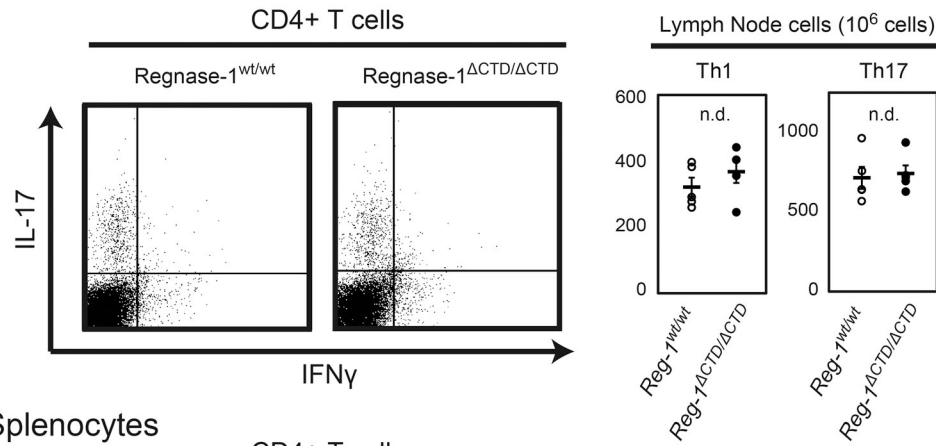

(2) Splenocytes

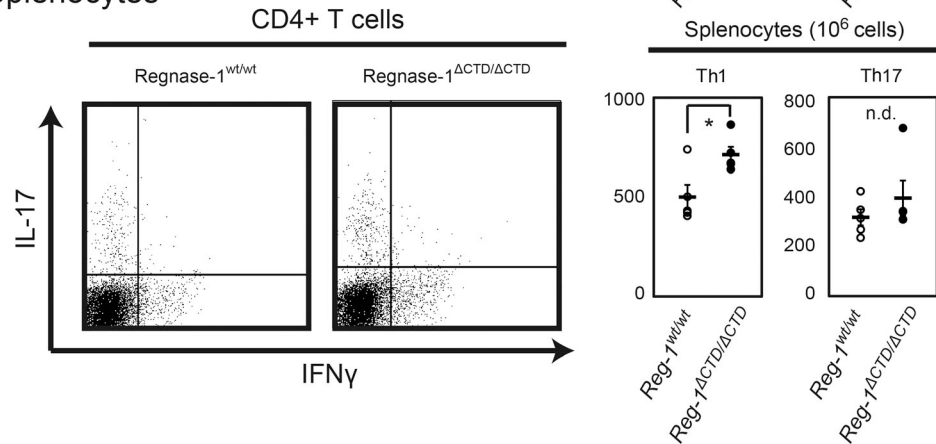

Figure S4. **Numbers of Th1 and Th17 cells are normal in lymph nodes but low in splenocytes from *Regnase-1*  $\Delta$ CTD mice with EAE pathogenesis.** Representative flow cytometric plots and statistics (each  $n = 5$ ) of CD4<sup>+</sup> T cell subsets (Th1 and Th17) in lymph node cells ( $1.0 \times 10^6$  cells; 1) and splenocytes ( $1.0 \times 10^6$  cells; 2) from WT and *Regnase-1* <sup>$\Delta$ CTD/ $\Delta$ CTD</sup> mice at 28 d after EAE immunization. \*,  $P < 0.05$ . n.d., no difference.

Table S1. **Phosphorylation sites of Regnase-1 mediated by Act-1 and TBK1/IKKi**

| Coexpression vectors in HEK293 cells         | Regnase-1 only (control)                                                               | Regnase-1 + Act-1 + TBK1                                                       | Regnase-1 + Act-1 + IKKi                                       |
|----------------------------------------------|----------------------------------------------------------------------------------------|--------------------------------------------------------------------------------|----------------------------------------------------------------|
| Sites identified only in control             | Ser18, Ser68, Thr195, Ser299, Ser408, Thr522, Thr555                                   | —                                                                              | —                                                              |
| Sites commonly identified                    | Ser103, Ser114, Ser344, Thr348, Ser354, Ser359, Ser368, Ser374, Ser394, Ser454, Ser482 | Ser103, Ser114, Ser344, Thr348, Ser359, Ser368, Ser374, Ser394, Ser454, Ser482 | Ser103, Ser114, Ser344, Thr348, Ser368, Ser394, Ser394, Ser454 |
| Sites identified only in both TBK-1 and IKKi | —                                                                                      | Ser28, Ser124, Thr115, Ser288, Ser494, Ser508, Ser513                          | —                                                              |
| Sites identified only in TBK-1               | —                                                                                      | Thr109, Ser404, Ser454, Ser470, Ser482, Thr498, Thr505, Ser592,                | —                                                              |
| Sites identified only in IKKi                | —                                                                                      | —                                                                              | Ser21, Ser268, Ser386, Ser439, Ser474                          |
